# Supplementary material for: Exploring the role of Chrysanthemum coronarium leaves distillation waste as a green inhibitor for carbon steel in acidic environment: an integrated study
Source: Royal Society of Chemistry journal article supplement (doi:10.1039/d4ra07430k), 2024-01-01
Supplement: d4ra07430k1.pdf [file d4ra07430k1.pdf]

## Supplementary figures

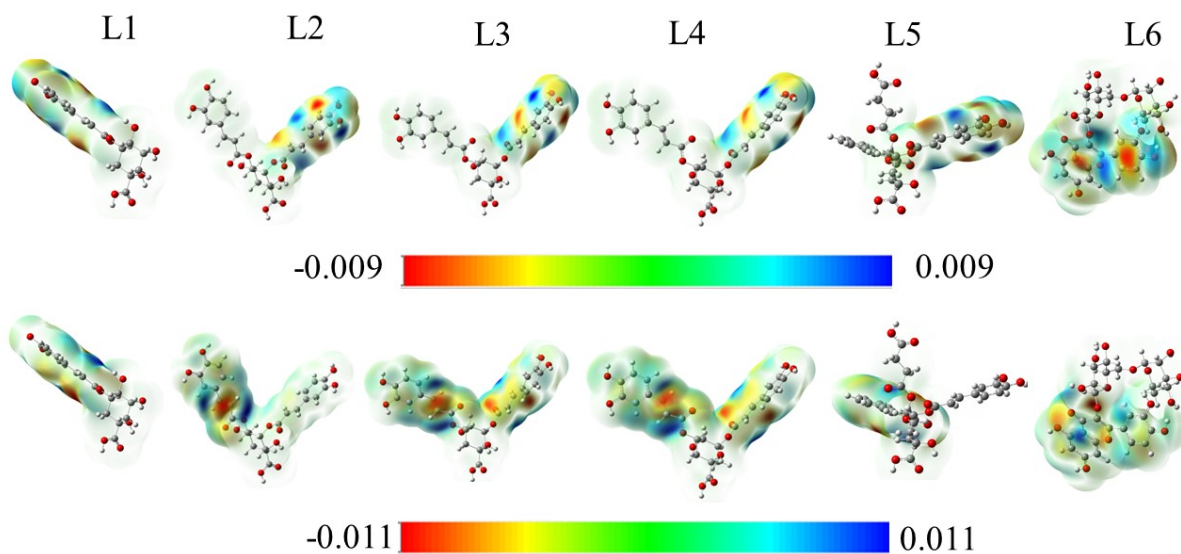

Figure SD1. Total densities at (*upper row*) HOMOs and (*lower row*) LUMOs for the components of the *Chrysanthemum Coronarium leaves* extract as obtained using the B3LYP/6-311+G(d,p) level of theory in aqueous solution.

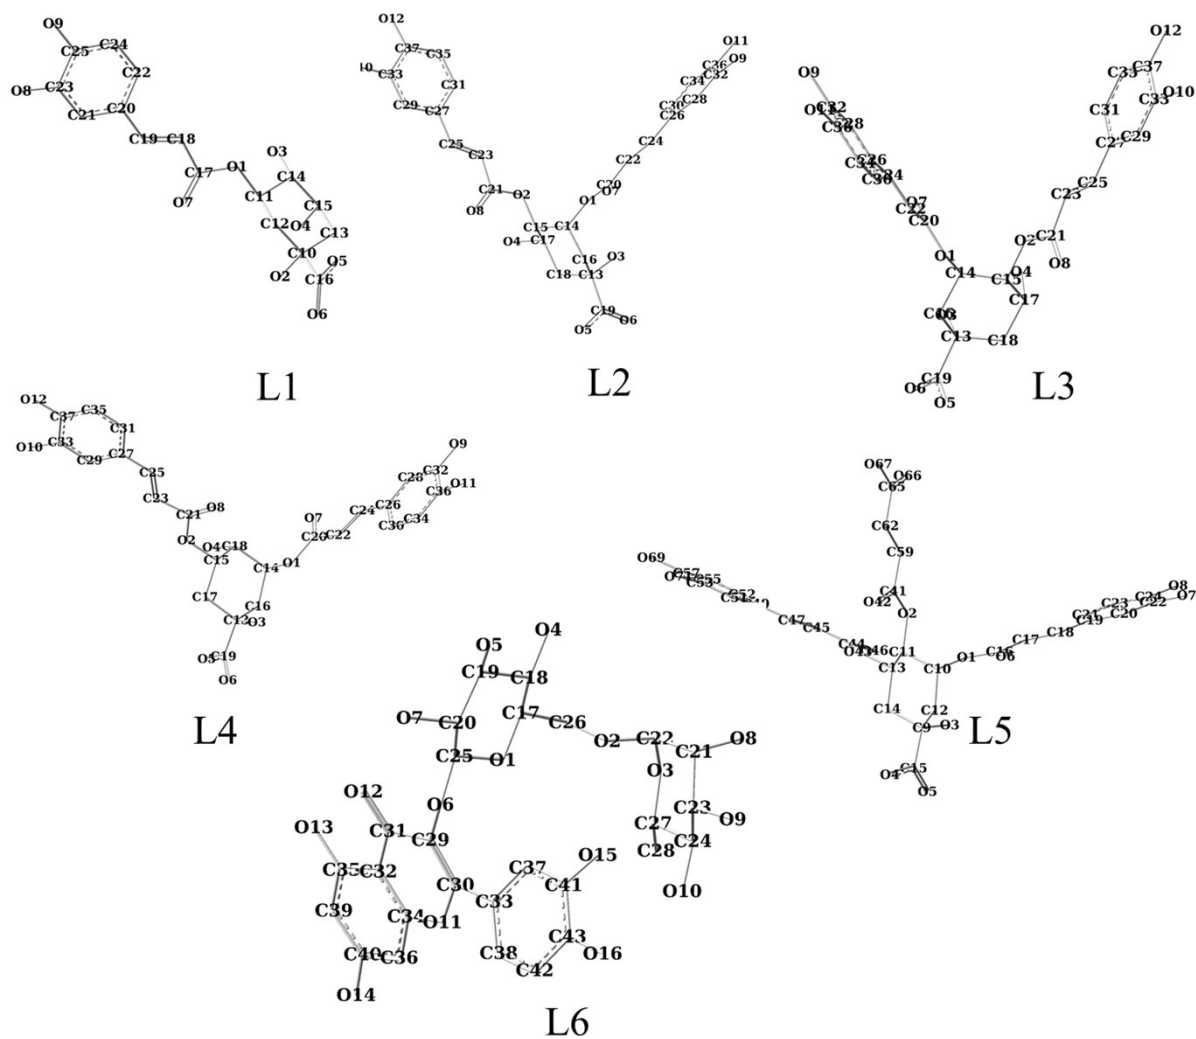

Figure SD2. Optimized structures of the investigated structures with atom numbering.

## Supplementary Tables

Table 1. Hirshfeld charges for N, N+1, and N-1 electron systems and the condensed Fukui indices for electrophilic,  $f_k^-$ , nucleophilic,  $f_k^+$ , and dual attacks,  $f_k^2$ , indices for **L1** inhibitor molecule. None-hydrogen atoms are only listed. Units in elementary charges (e).

| Atom | $q_k^N$ | $q_k^{N+1}$ | $q_k^{N-1}$ | $f_k^-$ | $f_k^+$ | $f_k^2$ |
|------|---------|-------------|-------------|---------|---------|---------|
| O1   | -0.1186 | -0.1540     | -0.1048     | 0.0138  | 0.0354  | 0.0216  |
| O2   | -0.1972 | -0.1984     | -0.1967     | 0.0005  | 0.0012  | 0.0006  |
| O3   | -0.2503 | -0.2547     | -0.2483     | 0.0020  | 0.0044  | 0.0024  |
| O4   | -0.2705 | -0.2728     | -0.2694     | 0.0011  | 0.0024  | 0.0013  |
| O5   | -0.1376 | -0.1388     | -0.1371     | 0.0005  | 0.0012  | 0.0007  |
| O6   | -0.2804 | -0.2836     | -0.2790     | 0.0014  | 0.0032  | 0.0018  |
| O7   | -0.3130 | -0.4037     | -0.2723     | 0.0407  | 0.0907  | 0.0501  |
| O8   | -0.1832 | -0.1989     | -0.1199     | 0.0633  | 0.0157  | -0.0477 |
| O9   | -0.1952 | -0.2298     | -0.1004     | 0.0948  | 0.0346  | -0.0602 |
| C10  | 0.0877  | 0.0863      | 0.0884      | 0.0007  | 0.0015  | 0.0008  |
| C11  | 0.0487  | 0.0414      | 0.0522      | 0.0035  | 0.0073  | 0.0038  |
| C12  | -0.0588 | -0.0622     | -0.0572     | 0.0016  | 0.0034  | 0.0019  |
| C13  | -0.0548 | -0.0556     | -0.0544     | 0.0004  | 0.0008  | 0.0004  |
| C14  | 0.0403  | 0.0380      | 0.0414      | 0.0011  | 0.0023  | 0.0013  |
| C15  | 0.0538  | 0.0520      | 0.0546      | 0.0008  | 0.0018  | 0.0010  |
| C16  | 0.2268  | 0.2252      | 0.2273      | 0.0005  | 0.0015  | 0.0010  |
| C17  | 0.1981  | 0.1120      | 0.2209      | 0.0227  | 0.0862  | 0.0634  |
| C18  | -0.0696 | -0.1735     | 0.0210      | 0.0905  | 0.1039  | 0.0134  |
| C19  | -0.0025 | -0.1290     | 0.0306      | 0.0330  | 0.1265  | 0.0935  |
| C20  | -0.0148 | -0.0480     | 0.0680      | 0.0827  | 0.0332  | -0.0495 |
| C21  | -0.0493 | -0.0979     | -0.0119     | 0.0374  | 0.0485  | 0.0111  |
| C22  | -0.0390 | -0.0932     | 0.0376      | 0.0765  | 0.0542  | -0.0223 |
| C23  | 0.0569  | 0.0321      | 0.1290      | 0.0721  | 0.0248  | -0.0473 |
| C24  | -0.0536 | -0.0835     | -0.0021     | 0.0514  | 0.0299  | -0.0215 |
| C25  | 0.0678  | 0.0139      | 0.1582      | 0.0905  | 0.0538  | -0.0367 |

Table 2. Hirshfeld charges for N, N+1, and N-1 electron systems and the condensed Fukui indices for electrophilic,  $f_k^-$ , nucleophilic,  $f_k^+$ , and dual attacks,  $f_k^2$ , indices for L2 inhibitor molecule. None-hydrogen atoms are only listed. Units in elementary charges (e).

| Atom | $q_k^N$ | $q_k^{N+1}$ | $q_k^{N-1}$ | $f_k^-$ | $f_k^+$ | $f_k^2$ |
|------|---------|-------------|-------------|---------|---------|---------|
| O1   | -0.1197 | -0.1323     | -0.1125     | 0.0072  | 0.0126  | 0.0054  |
| O2   | -0.1240 | -0.1478     | -0.1179     | 0.0061  | 0.0238  | 0.0178  |
| O3   | -0.2396 | -0.2406     | -0.2393     | 0.0003  | 0.0011  | 0.0007  |
| O4   | -0.2409 | -0.2434     | -0.2398     | 0.0010  | 0.0025  | 0.0015  |
| O5   | -0.1382 | -0.1391     | -0.1377     | 0.0004  | 0.0009  | 0.0005  |
| O6   | -0.2826 | -0.2849     | -0.2815     | 0.0011  | 0.0024  | 0.0013  |
| O7   | -0.3173 | -0.3511     | -0.2958     | 0.0215  | 0.0338  | 0.0123  |
| O8   | -0.3166 | -0.3770     | -0.2983     | 0.0184  | 0.0604  | 0.0420  |
| O9   | -0.2025 | -0.2088     | -0.1627     | 0.0398  | 0.0064  | -0.0334 |
| O10  | -0.2023 | -0.2137     | -0.1694     | 0.0329  | 0.0115  | -0.0214 |
| O11  | -0.1938 | -0.2062     | -0.1435     | 0.0504  | 0.0124  | -0.0380 |
| O12  | -0.1935 | -0.2156     | -0.1519     | 0.0416  | 0.0221  | -0.0195 |
| C13  | 0.0849  | 0.0846      | 0.0849      | 0.0001  | 0.0003  | 0.0002  |
| C14  | 0.0626  | 0.0582      | 0.0651      | 0.0025  | 0.0044  | 0.0019  |
| C15  | 0.0502  | 0.0444      | 0.0524      | 0.0022  | 0.0058  | 0.0036  |
| C16  | -0.0543 | -0.0571     | -0.0529     | 0.0014  | 0.0028  | 0.0015  |
| C17  | 0.0504  | 0.0485      | 0.0511      | 0.0007  | 0.0020  | 0.0013  |
| C18  | -0.0609 | -0.0624     | -0.0604     | 0.0005  | 0.0015  | 0.0010  |
| C19  | 0.2259  | 0.2249      | 0.2263      | 0.0004  | 0.0010  | 0.0006  |
| C20  | 0.1958  | 0.1645      | 0.2080      | 0.0122  | 0.0313  | 0.0192  |
| C21  | 0.1947  | 0.1381      | 0.2052      | 0.0105  | 0.0565  | 0.0460  |
| C22  | -0.0694 | -0.1050     | -0.0220     | 0.0474  | 0.0356  | -0.0118 |
| C23  | -0.0695 | -0.1365     | -0.0305     | 0.0390  | 0.0670  | 0.0280  |
| C24  | -0.0041 | -0.0504     | 0.0136      | 0.0177  | 0.0463  | 0.0286  |
| C25  | -0.0030 | -0.0864     | 0.0115      | 0.0145  | 0.0834  | 0.0689  |
| C26  | -0.0150 | -0.0263     | 0.0290      | 0.0440  | 0.0114  | -0.0326 |
| C27  | -0.0149 | -0.0361     | 0.0214      | 0.0363  | 0.0212  | -0.0150 |
| C28  | -0.0518 | -0.0691     | -0.0316     | 0.0202  | 0.0173  | -0.0029 |
| C29  | -0.0514 | -0.0827     | -0.0347     | 0.0167  | 0.0313  | 0.0146  |
| C30  | -0.0403 | -0.0598     | 0.0040      | 0.0443  | 0.0195  | -0.0248 |
| C31  | -0.0399 | -0.0752     | -0.0035     | 0.0363  | 0.0354  | -0.0009 |
| C32  | 0.0574  | 0.0483      | 0.0984      | 0.0410  | 0.0090  | -0.0320 |
| C33  | 0.0575  | 0.0412      | 0.0915      | 0.0339  | 0.0164  | -0.0175 |
| C34  | -0.0550 | -0.0655     | -0.0280     | 0.0269  | 0.0105  | -0.0164 |
| C35  | -0.0548 | -0.0738     | -0.0327     | 0.0221  | 0.0190  | -0.0032 |
| C36  | 0.0673  | 0.0479      | 0.1171      | 0.0498  | 0.0194  | -0.0304 |

C37            0.0676            0.0327            0.1085            0.0410            0.0348            -0.0061

---

Table 3. Hirshfeld charges for N, N+1, and N-1 electron systems and the condensed Fukui indices for electrophilic,  $f_k^-$ , nucleophilic,  $f_k^+$ , and dual attacks,  $f_k^2$ , indices for **L3** inhibitor molecule. None-hydrogen atoms are only listed. Units in elementary charges (e).

| Atom | $q_k^N$ | $q_k^{N+1}$ | $q_k^{N-1}$ | $f_k^-$ | $f_k^+$ | $f_k^2$ |
|------|---------|-------------|-------------|---------|---------|---------|
| O1   | -0.1219 | -0.1402     | -0.1153     | 0.0066  | 0.0183  | 0.0117  |
| O2   | -0.1231 | -0.1417     | -0.116      | 0.0071  | 0.0186  | 0.0116  |
| O3   | -0.2285 | -0.2296     | -0.228      | 0.0005  | 0.0011  | 0.0007  |
| O4   | -0.2494 | -0.2518     | -0.2483     | 0.0011  | 0.0024  | 0.0013  |
| O5   | -0.1365 | -0.1375     | -0.1361     | 0.0004  | 0.0011  | 0.0007  |
| O6   | -0.2781 | -0.2808     | -0.2769     | 0.0011  | 0.0028  | 0.0017  |
| O7   | -0.3163 | -0.363      | -0.2971     | 0.0192  | 0.0467  | 0.0275  |
| O8   | -0.3165 | -0.364      | -0.2959     | 0.0206  | 0.0475  | 0.0269  |
| O9   | -0.2026 | -0.2115     | -0.1677     | 0.0349  | 0.0089  | -0.0261 |
| O10  | -0.2022 | -0.2112     | -0.1644     | 0.0378  | 0.0089  | -0.0288 |
| O11  | -0.1935 | -0.2107     | -0.1493     | 0.0442  | 0.0172  | -0.027  |
| O12  | -0.1935 | -0.2108     | -0.1459     | 0.0476  | 0.0174  | -0.0303 |
| C13  | 0.0864  | 0.0855      | 0.0867      | 0.0003  | 0.0009  | 0.0005  |
| C14  | 0.0517  | 0.0466      | 0.0541      | 0.0024  | 0.0051  | 0.0027  |
| C15  | 0.0477  | 0.0426      | 0.0502      | 0.0025  | 0.0051  | 0.0026  |
| C16  | -0.0564 | -0.0595     | -0.0552     | 0.0013  | 0.003   | 0.0018  |
| C17  | 0.0576  | 0.0547      | 0.0588      | 0.0013  | 0.0029  | 0.0016  |
| C18  | -0.0514 | -0.0528     | -0.0508     | 0.0006  | 0.0014  | 0.0008  |
| C19  | 0.2274  | 0.226       | 0.2278      | 0.0004  | 0.0014  | 0.0009  |
| C20  | 0.1961  | 0.1519      | 0.2072      | 0.0111  | 0.0442  | 0.0331  |
| C21  | 0.196   | 0.151       | 0.2079      | 0.0119  | 0.0449  | 0.033   |
| C22  | -0.0693 | -0.1203     | -0.0276     | 0.0417  | 0.051   | 0.0093  |
| C23  | -0.0693 | -0.1208     | -0.0246     | 0.0447  | 0.0515  | 0.0068  |
| C24  | -0.0031 | -0.0677     | 0.0122      | 0.0153  | 0.0645  | 0.0492  |
| C25  | -0.0029 | -0.0686     | 0.0135      | 0.0164  | 0.0657  | 0.0492  |
| C26  | -0.0149 | -0.0307     | 0.0235      | 0.0385  | 0.0158  | -0.0227 |
| C27  | -0.015  | -0.031      | 0.0265      | 0.0415  | 0.016   | -0.0255 |
| C28  | -0.0515 | -0.0755     | -0.0338     | 0.0177  | 0.024   | 0.0064  |
| C29  | -0.0515 | -0.0759     | -0.0324     | 0.0191  | 0.0243  | 0.0052  |
| C30  | -0.0398 | -0.0669     | -0.0011     | 0.0386  | 0.0272  | -0.0115 |
| C31  | -0.0398 | -0.0672     | 0.0019      | 0.0418  | 0.0274  | -0.0143 |
| C32  | 0.0576  | 0.0451      | 0.0936      | 0.036   | 0.0126  | -0.0234 |
| C33  | 0.0574  | 0.0448      | 0.0963      | 0.0388  | 0.0127  | -0.0262 |
| C34  | -0.0547 | -0.0693     | -0.0311     | 0.0236  | 0.0146  | -0.009  |
| C35  | -0.0547 | -0.0695     | -0.0292     | 0.0255  | 0.0148  | -0.0107 |
| C36  | 0.0679  | 0.041       | 0.1116      | 0.0436  | 0.027   | -0.0167 |
| C37  | 0.0676  | 0.0404      | 0.1146      | 0.047   | 0.0272  | -0.0198 |

Table 4. Hirshfeld charges for N, N+1, and N-1 electron systems and the condensed Fukui indices for electrophilic,  $f_k^-$ , nucleophilic,  $f_k^+$ , and dual attacks,  $f_k^2$ , indices for **L5** inhibitor molecule. None-hydrogen atoms are only listed. Units in elementary charges (e).

| Atom | $q_k^N$ | $q_k^{N+1}$ | $q_k^{N-1}$ | $f_k^-$ | $f_k^+$ | $f_k^2$ |
|------|---------|-------------|-------------|---------|---------|---------|
| O1   | -0.1181 | -0.1350     | -0.1067     | 0.0114  | 0.0168  | 0.0054  |
| O2   | -0.1228 | -0.1430     | -0.1196     | 0.0032  | 0.0202  | 0.0170  |
| O3   | -0.2395 | -0.2406     | -0.2392     | 0.0003  | 0.0011  | 0.0008  |
| O4   | -0.2263 | -0.2307     | -0.2235     | 0.0028  | 0.0043  | 0.0015  |
| O5   | -0.1382 | -0.1393     | -0.1377     | 0.0005  | 0.0011  | 0.0006  |
| O6   | -0.2836 | -0.2863     | -0.2825     | 0.0011  | 0.0027  | 0.0015  |
| O7   | -0.3148 | -0.3587     | -0.2831     | 0.0317  | 0.0438  | 0.0121  |
| O8   | -0.3171 | -0.3651     | -0.3103     | 0.0067  | 0.0481  | 0.0413  |
| O9   | -0.2023 | -0.2107     | -0.1417     | 0.0606  | 0.0084  | -0.0522 |
| O10  | -0.2009 | -0.2103     | -0.1898     | 0.0111  | 0.0093  | -0.0017 |
| O11  | -0.1935 | -0.2097     | -0.1173     | 0.0762  | 0.0162  | -0.0599 |
| O12  | -0.1922 | -0.2110     | -0.1765     | 0.0156  | 0.0189  | 0.0032  |
| C13  | 0.0861  | 0.0854      | 0.0862      | 0.0001  | 0.0007  | 0.0006  |
| C14  | 0.0593  | 0.0550      | 0.0625      | 0.0032  | 0.0043  | 0.0011  |
| C15  | 0.0520  | 0.0478      | 0.0529      | 0.0009  | 0.0042  | 0.0033  |
| C16  | -0.0567 | -0.0586     | -0.0554     | 0.0013  | 0.0019  | 0.0006  |
| C17  | -0.0618 | -0.0637     | -0.0613     | 0.0005  | 0.0019  | 0.0014  |
| C18  | 0.0469  | 0.0442      | 0.0483      | 0.0015  | 0.0026  | 0.0011  |
| C19  | 0.2258  | 0.2247      | 0.2263      | 0.0004  | 0.0012  | 0.0007  |
| C20  | 0.1970  | 0.1557      | 0.2150      | 0.0179  | 0.0414  | 0.0234  |
| C21  | 0.1961  | 0.1500      | 0.2002      | 0.0041  | 0.0461  | 0.0419  |
| C22  | -0.0690 | -0.1166     | 0.0027      | 0.0717  | 0.0476  | -0.0240 |
| C23  | -0.0708 | -0.1244     | -0.0550     | 0.0158  | 0.0535  | 0.0377  |
| C24  | -0.0031 | -0.0642     | 0.0231      | 0.0262  | 0.0611  | 0.0348  |
| C25  | -0.0044 | -0.0719     | 0.0015      | 0.0059  | 0.0674  | 0.0615  |
| C26  | -0.0149 | -0.0301     | 0.0517      | 0.0666  | 0.0152  | -0.0514 |
| C27  | -0.0154 | -0.0328     | -0.0016     | 0.0138  | 0.0174  | 0.0036  |
| C28  | -0.0516 | -0.0744     | -0.0212     | 0.0304  | 0.0228  | -0.0076 |
| C29  | -0.0537 | -0.0821     | -0.0476     | 0.0061  | 0.0285  | 0.0224  |
| C30  | -0.0399 | -0.0657     | 0.0272      | 0.0672  | 0.0258  | -0.0414 |
| C31  | -0.0388 | -0.0655     | -0.0253     | 0.0135  | 0.0266  | 0.0131  |
| C32  | 0.0575  | 0.0456      | 0.1197      | 0.0622  | 0.0119  | -0.0503 |
| C33  | 0.0607  | 0.0471      | 0.0722      | 0.0114  | 0.0137  | 0.0022  |
| C34  | -0.0548 | -0.0687     | -0.0141     | 0.0407  | 0.0139  | -0.0268 |
| C35  | -0.0579 | -0.0747     | -0.0489     | 0.0090  | 0.0168  | 0.0078  |
| C36  | 0.0676  | 0.0421      | 0.1428      | 0.0752  | 0.0256  | -0.0496 |
| C37  | 0.0695  | 0.0392      | 0.0848      | 0.0153  | 0.0303  | 0.0150  |

Table 5. Hirshfeld charges for N, N+1, and N-1 electron systems and the condensed Fukui indices for electrophilic,  $f_k^-$ , nucleophilic,  $f_k^+$ , and dual attacks,  $f_k^2$ , indices for L5 inhibitor molecule. None-hydrogen atoms are only listed. Units in elementary charges (e).

| Atom | $q_k^N$ | $q_k^{N+1}$ | $q_k^{N-1}$ | $f_k^-$ | $f_k^+$ | $f_k^2$ |
|------|---------|-------------|-------------|---------|---------|---------|
| O1   | -0.1200 | -0.1198     | -0.1070     | 0.0130  | -0.0003 | -0.0133 |
| O2   | -0.1179 | -0.1182     | -0.1179     | 0.0000  | 0.0003  | 0.0002  |
| O3   | -0.2376 | -0.2391     | -0.2373     | 0.0003  | 0.0015  | 0.0012  |
| O4   | -0.1370 | -0.1381     | -0.1364     | 0.0006  | 0.0011  | 0.0005  |
| O5   | -0.2794 | -0.2824     | -0.2783     | 0.0012  | 0.0029  | 0.0017  |
| O6   | -0.3161 | -0.3174     | -0.2774     | 0.0388  | 0.0013  | -0.0375 |
| O7   | -0.2023 | -0.2024     | -0.1287     | 0.0735  | 0.0002  | -0.0734 |
| O8   | -0.1935 | -0.1937     | -0.1014     | 0.0920  | 0.0002  | -0.0918 |
| C9   | 0.0862  | 0.0848      | 0.0863      | 0.0001  | 0.0014  | 0.0013  |
| C10  | 0.0623  | 0.0611      | 0.0656      | 0.0034  | 0.0012  | -0.0022 |
| C11  | 0.0530  | 0.0511      | 0.0540      | 0.0010  | 0.0019  | 0.0010  |
| C12  | -0.0527 | -0.0532     | -0.0510     | 0.0016  | 0.0006  | -0.0011 |
| C13  | 0.0548  | 0.0479      | 0.0549      | 0.0001  | 0.0069  | 0.0068  |
| C14  | -0.0576 | -0.0605     | -0.0574     | 0.0002  | 0.0028  | 0.0026  |
| C15  | 0.2270  | 0.2256      | 0.2274      | 0.0005  | 0.0014  | 0.0009  |
| C16  | 0.1968  | 0.1962      | 0.2184      | 0.0216  | 0.0006  | -0.0210 |
| C17  | -0.0690 | -0.0689     | 0.0173      | 0.0862  | -0.0001 | -0.0863 |
| C18  | -0.0029 | -0.0036     | 0.0285      | 0.0315  | 0.0006  | -0.0308 |
| C19  | -0.0149 | -0.0150     | 0.0656      | 0.0805  | 0.0000  | -0.0804 |
| C20  | -0.0515 | -0.0517     | -0.0148     | 0.0367  | 0.0002  | -0.0365 |
| C21  | -0.0398 | -0.0399     | 0.0413      | 0.0811  | 0.0001  | -0.0810 |
| C22  | 0.0575  | 0.0574      | 0.1328      | 0.0753  | 0.0002  | -0.0751 |
| C23  | -0.0547 | -0.0548     | -0.0056     | 0.0491  | 0.0001  | -0.0490 |
| C24  | 0.0677  | 0.0674      | 0.1584      | 0.0907  | 0.0003  | -0.0904 |
| C41  | 0.2278  | 0.2263      | 0.2284      | 0.0006  | 0.0016  | 0.0010  |
| O42  | -0.2897 | -0.2924     | -0.2882     | 0.0015  | 0.0027  | 0.0012  |
| O43  | -0.1127 | -0.1394     | -0.1123     | 0.0004  | 0.0267  | 0.0262  |
| C44  | 0.1997  | 0.1169      | 0.2000      | 0.0003  | 0.0828  | 0.0826  |
| C45  | -0.0603 | -0.1642     | -0.0603     | 0.0000  | 0.1039  | 0.1039  |
| O46  | -0.3175 | -0.4150     | -0.3172     | 0.0003  | 0.0975  | 0.0972  |
| C47  | -0.0032 | -0.1237     | -0.0029     | 0.0003  | 0.1205  | 0.1202  |
| C49  | -0.0044 | -0.0432     | -0.0044     | 0.0000  | 0.0387  | 0.0387  |
| C51  | -0.0305 | -0.0799     | -0.0304     | 0.0001  | 0.0494  | 0.0493  |
| C52  | -0.0309 | -0.0874     | -0.0309     | 0.0001  | 0.0565  | 0.0564  |
| C53  | -0.0377 | -0.0758     | -0.0376     | 0.0001  | 0.0380  | 0.0379  |
| C55  | -0.0359 | -0.0694     | -0.0358     | 0.0001  | 0.0335  | 0.0334  |
| C57  | -0.0296 | -0.1008     | -0.0294     | 0.0002  | 0.0712  | 0.0710  |
| C61  | -0.0433 | -0.0440     | -0.0431     | 0.0002  | 0.0007  | 0.0004  |
| C64  | -0.0421 | -0.0423     | -0.0419     | 0.0002  | 0.0003  | 0.0001  |
| C67  | 0.2266  | 0.2265      | 0.2267      | 0.0001  | 0.0001  | 0.0000  |
| O68  | -0.3166 | -0.3168     | -0.3167     | 0.0000  | 0.0002  | 0.0002  |
| O69  | -0.1701 | -0.1704     | -0.1700     | 0.0002  | 0.0002  | 0.0001  |
| O71  | -0.2023 | -0.2024     | -0.1287     | 0.0735  | 0.0002  | -0.0734 |
| O72  | -0.1945 | -0.1941     | -0.1016     | 0.0929  | 0.0004  | -0.0925 |

Table 6. Hirshfeld charges for N, N+1, and N-1 electron systems and the condensed Fukui indices for electrophilic,  $f_k^-$ , nucleophilic,  $f_k^+$ , and dual attacks,  $f_k^2$ , indices for L6 inhibitor molecule. None-hydrogen atoms are only listed. Units in elementary charges (e).

| Atom | $q_k^N$ | $q_k^{N+1}$ | $q_k^{N-1}$ | $f_k^-$ | $f_k^+$ | $f_k^2$ |
|------|---------|-------------|-------------|---------|---------|---------|
| O1   | -0.1609 | -0.1627     | -0.1577     | 0.0032  | 0.0018  | -0.0014 |
| O2   | -0.1538 | -0.1539     | -0.1537     | 0.0001  | 0.0001  | 0.0000  |
| O3   | -0.1752 | -0.1755     | -0.1747     | 0.0005  | 0.0003  | -0.0001 |
| O4   | -0.2250 | -0.2269     | -0.2227     | 0.0024  | 0.0019  | -0.0005 |
| O5   | -0.2479 | -0.2498     | -0.2455     | 0.0024  | 0.0020  | -0.0004 |
| O6   | -0.1373 | -0.1510     | -0.1036     | 0.0337  | 0.0137  | -0.0200 |
| O7   | -0.2444 | -0.2479     | -0.2397     | 0.0046  | 0.0036  | -0.0010 |
| O8   | -0.2286 | -0.2290     | -0.2281     | 0.0005  | 0.0004  | -0.0001 |
| O9   | -0.2584 | -0.2587     | -0.2580     | 0.0004  | 0.0003  | -0.0001 |
| O10  | -0.2394 | -0.2395     | -0.2393     | 0.0001  | 0.0001  | 0.0000  |
| O11  | -0.0685 | -0.1065     | -0.0483     | 0.0202  | 0.0380  | 0.0177  |
| O12  | -0.3313 | -0.4414     | -0.2882     | 0.0431  | 0.1101  | 0.0669  |
| O13  | -0.1789 | -0.2039     | -0.1585     | 0.0204  | 0.0250  | 0.0045  |
| O14  | -0.1829 | -0.2053     | -0.1650     | 0.0179  | 0.0224  | 0.0045  |
| O15  | -0.1808 | -0.1929     | -0.1410     | 0.0398  | 0.0121  | -0.0277 |
| O16  | -0.1969 | -0.2234     | -0.1268     | 0.0700  | 0.0266  | -0.0434 |
| C17  | 0.0534  | 0.0514      | 0.0561      | 0.0027  | 0.0020  | -0.0007 |
| C18  | 0.0401  | 0.0396      | 0.0407      | 0.0006  | 0.0005  | -0.0001 |
| C19  | 0.0390  | 0.0380      | 0.0404      | 0.0014  | 0.0010  | -0.0003 |
| C20  | 0.0403  | 0.0380      | 0.0426      | 0.0023  | 0.0022  | 0.0000  |
| C21  | 0.0419  | 0.0417      | 0.0421      | 0.0002  | 0.0001  | 0.0000  |
| C22  | 0.1174  | 0.1171      | 0.1178      | 0.0004  | 0.0003  | -0.0001 |
| C23  | 0.0353  | 0.0350      | 0.0357      | 0.0004  | 0.0002  | -0.0002 |
| C24  | 0.0387  | 0.0386      | 0.0388      | 0.0001  | 0.0001  | 0.0000  |
| C25  | 0.1156  | 0.1109      | 0.1220      | 0.0064  | 0.0046  | -0.0018 |
| C26  | 0.0286  | 0.0276      | 0.0299      | 0.0014  | 0.0009  | -0.0004 |
| C27  | 0.0473  | 0.0472      | 0.0474      | 0.0001  | 0.0001  | 0.0000  |
| C28  | -0.0873 | -0.0874     | -0.0872     | 0.0001  | 0.0001  | 0.0000  |
| C29  | 0.0260  | -0.0170     | 0.1018      | 0.0757  | 0.0431  | -0.0327 |
| C30  | 0.0890  | 0.0046      | 0.1250      | 0.0361  | 0.0843  | 0.0483  |
| C31  | 0.1015  | 0.0081      | 0.1215      | 0.0200  | 0.0935  | 0.0734  |
| C32  | -0.0540 | -0.0727     | -0.0382     | 0.0158  | 0.0186  | 0.0029  |
| C33  | -0.0241 | -0.0472     | 0.0332      | 0.0574  | 0.0230  | -0.0343 |
| C34  | 0.0902  | 0.0700      | 0.1003      | 0.0102  | 0.0202  | 0.0100  |
| C35  | 0.0955  | 0.0567      | 0.1154      | 0.0199  | 0.0388  | 0.0189  |
| C36  | -0.0871 | -0.1165     | -0.0552     | 0.0319  | 0.0294  | -0.0025 |
| C37  | -0.0566 | -0.0921     | -0.0303     | 0.0263  | 0.0355  | 0.0092  |
| C38  | -0.0471 | -0.0859     | 0.0106      | 0.0577  | 0.0388  | -0.0189 |
| C39  | -0.0853 | -0.1145     | -0.0690     | 0.0162  | 0.0293  | 0.0130  |
| C40  | 0.0916  | 0.0578      | 0.1117      | 0.0200  | 0.0338  | 0.0137  |
| C41  | 0.0566  | 0.0377      | 0.1040      | 0.0473  | 0.0189  | -0.0284 |
| C42  | -0.0570 | -0.0810     | -0.0151     | 0.0419  | 0.0240  | -0.0180 |
| C43  | 0.0653  | 0.0241      | 0.1334      | 0.0681  | 0.0411  | -0.0270 |
